# Supplementary material
Source: HighWire-hosted journal article supplement (https://bmjopen.bmj.com/content/7/10/e016234)
Supplement: inline-supplementary-material-1 [file inline-supplementary-material-1.pdf]

## Supplemental

Table 1a and 1b: Main characteristics of patients, caregivers and health professionals participating in the qualitative pre-investigation.

Table 1a: Main characteristics of the patients and caregivers participating in the qualitative pre-investigation

|                         |                                      | Patients<br>N | Relatives<br>N |
|-------------------------|--------------------------------------|---------------|----------------|
| Sex                     | Women                                | 10            | 3              |
|                         | Men                                  | 9             | 1              |
| Age                     | < 65                                 | 9             | 2              |
|                         | ≥ 65                                 | 10            | 2              |
|                         | Mean                                 | 63.2 years    | 64.5 years     |
| Heart disease (patient) | Ischaemic heart disease              | 9             | 1              |
|                         | Atrial fibrillation                  | 8             | 2              |
|                         | Heart failure                        | 7             | 2              |
|                         | Heart valve disease                  | 2             | 0              |
| Cohabitation status     | Living alone                         | 5             | 0              |
|                         | Living with others                   | 16            | 4              |
| Employment status       | Employed full time                   | 5             | 2              |
|                         | Employed part time                   | 2             | 0              |
|                         | Not employed                         | 12            | 1              |
| Education               | Basic school                         | 1             | 0              |
|                         | Upper secondary or vocational school | 3             | 0              |
|                         | Short-cycle higher education         | 0             | 0              |
|                         | Medium-cycle higher education        | 7             | 2              |
|                         | Long-cycle higher education          | 3             | 0              |
|                         | Unclassifiable                       | 5             | 2              |
| Relative                | Spouse                               | -             | 3              |
|                         | Daughter                             | -             | 1              |

Table 1b: Main characteristics of the health professionals participating in the qualitative pre-investigation

|                   |                      | N |
|-------------------|----------------------|---|
| Sex               | Women                | 5 |
|                   | Men                  | 3 |
| Health profession | Physician            | 2 |
|                   | Nurse                | 3 |
|                   | Physiotherapist      | 1 |
|                   | Psychologist         | 1 |
|                   | Social worker        | 1 |
| Sector            | Hospital             | 5 |
|                   | General practice     | 1 |
|                   | Municipality         | 1 |
|                   | Patient organisation | 1 |
