# Supplementary material
Source: HighWire-hosted journal article supplement (https://bmjopen.bmj.com/content/7/10/e016234)
Supplement: inline-supplementary-material-5 [file inline-supplementary-material-5.pdf]

## Supplemental

Table 4: Selection criteria for inclusion of heart patients from the National Patient Register

| Disease                 | Diagnosis <sup>1</sup>          | Surgery <sup>2</sup>      | In-patient | Out-patient | Primary diagnosis | Secondary diagnosis |
|-------------------------|---------------------------------|---------------------------|------------|-------------|-------------------|---------------------|
| Ischaemic heart disease | I20, I21, I23, I24, I25         | -                         | Yes        | No          | Yes               | No                  |
| Heart valve disease     | -                               | KFG, KFK, KFM, KFJE, KFJF | -          | -           | -                 | -                   |
| Heart failure           | I11.0, I13.0, I13.2, I42.0, I50 | -                         | Yes        | Yes         | Yes               | No                  |
| Atrial fibrillation     | I48                             | -                         | Yes        | Yes         | Yes               | Yes                 |

<sup>1</sup>According to the 10th revision of the World Health Organisation International Classification of Diseases (ICD).

<sup>2</sup>According to the Danish version of the Nordic Classification of surgical procedures.

‘-’ indicates that the information is not relevant.
