# Supplementary material
Source: HighWire-hosted journal article supplement (https://bmjopen.bmj.com/content/7/10/e016234)
Supplement: inline-supplementary-material-6 [file inline-supplementary-material-6.pdf]

## Supplemental

**Table 5: Results from the final exploratory factor analysis-model with all dimensions simultaneously using promax rotation (Pattern matrix with factor loadings) (n=507).**

| Item                                        | Factor 1    | Factor 2    | Factor 3    | Factor 4    | Factor 5    | Factor 6    | Factor 7    | Factor 8    |
|---------------------------------------------|-------------|-------------|-------------|-------------|-------------|-------------|-------------|-------------|
| <u>Communication with the GP</u>            |             |             |             |             |             |             |             |             |
| A7                                          | <b>0.62</b> | 0.07        | 0.04        | -0.04       | 0.11        | 0.05        | -0.19       | -0.10       |
| A8                                          | <b>0.95</b> | -0.03       | -0.03       | 0.00        | -0.05       | -0.02       | 0.01        | 0.03        |
| A9                                          | <b>0.95</b> | -0.03       | 0.01        | 0.02        | -0.01       | -0.02       | 0.03        | 0.00        |
| A10                                         | <b>0.89</b> | 0.02        | -0.05       | 0.03        | 0.00        | 0.04        | 0.04        | 0.00        |
| A11                                         | <b>0.93</b> | -0.02       | 0.00        | 0.02        | 0.00        | -0.03       | 0.03        | 0.02        |
| E5                                          | <b>0.44</b> | 0.11        | 0.05        | -0.10       | 0.03        | 0.18        | 0.10        | -0.02       |
| <u>Communication at the hospital</u>        |             |             |             |             |             |             |             |             |
| A2                                          | 0.01        | <b>0.54</b> | 0.00        | -0.07       | 0.17        | 0.20        | -0.25       | -0.09       |
| A3                                          | -0.01       | <b>0.80</b> | -0.05       | 0.01        | 0.03        | -0.04       | 0.07        | 0.03        |
| A4                                          | 0.05        | <b>0.76</b> | -0.02       | 0.04        | 0.00        | 0.04        | 0.00        | 0.03        |
| A5                                          | 0.07        | <b>0.81</b> | 0.02        | 0.04        | -0.06       | -0.07       | 0.02        | 0.06        |
| A6                                          | 0.03        | <b>0.83</b> | 0.02        | -0.04       | -0.05       | -0.06       | 0.05        | 0.10        |
| E2                                          | -0.08       | <b>0.48</b> | -0.02       | 0.09        | -0.09       | 0.20        | 0.17        | -0.04       |
| <u>Information on psychosocial aspects</u>  |             |             |             |             |             |             |             |             |
| D1                                          | 0.01        | 0.00        | <b>0.69</b> | 0.10        | 0.00        | 0.21        | 0.01        | -0.02       |
| D2                                          | -0.01       | -0.04       | <b>0.91</b> | -0.02       | -0.06       | 0.06        | 0.01        | 0.07        |
| D3                                          | 0.01        | 0.01        | <b>0.92</b> | -0.02       | -0.06       | 0.07        | -0.01       | 0.02        |
| D4                                          | -0.03       | -0.01       | <b>0.80</b> | 0.12        | 0.05        | -0.06       | 0.03        | -0.04       |
| <u>Rehabilitation/support</u>               |             |             |             |             |             |             |             |             |
| C1                                          | n/a         | n/a         | n/a         | n/a         | n/a         | n/a         | n/a         | n/a         |
| C2                                          | -0.01       | -0.10       | -0.14       | <b>0.65</b> | -0.09       | 0.20        | 0.02        | 0.15        |
| C3                                          | -0.01       | -0.00       | -0.08       | <b>0.74</b> | -0.02       | 0.13        | 0.00        | -0.04       |
| C4                                          | 0.02        | 0.06        | 0.05        | <b>0.75</b> | 0.00        | -0.03       | -0.01       | -0.05       |
| C5                                          | -0.02       | 0.06        | 0.33        | <b>0.53</b> | 0.05        | -0.23       | 0.02        | -0.08       |
| C6                                          | 0.01        | 0.02        | 0.09        | <b>0.51</b> | 0.07        | -0.12       | -0.06       | 0.04        |
| D5                                          | 0.00        | 0.02        | 0.12        | <b>0.45</b> | 0.13        | 0.03        | -0.08       | 0.06        |
| <u>Medication</u>                           |             |             |             |             |             |             |             |             |
| F2                                          | 0.01        | 0.11        | -0.10       | 0.04        | <b>0.66</b> | 0.13        | 0.00        | -0.09       |
| F3                                          | 0.15        | -0.03       | 0.12        | -0.01       | <b>0.58</b> | -0.03       | 0.04        | 0.08        |
| F4                                          | -0.02       | -0.09       | -0.01       | 0.03        | <b>0.71</b> | 0.01        | 0.11        | 0.10        |
| F5                                          | n/a         | n/a         | n/a         | n/a         | n/a         | n/a         | n/a         | n/a         |
| <u>Information on disease and treatment</u> |             |             |             |             |             |             |             |             |
| B1                                          | 0.11        | 0.16        | 0.03        | -0.06       | 0.02        | <b>0.58</b> | -0.01       | 0.00        |
| B2                                          | 0.03        | 0.02        | 0.28        | 0.01        | 0.05        | <b>0.59</b> | -0.05       | -0.05       |
| B3                                          | 0.01        | 0.01        | 0.12        | 0.34        | -0.03       | <b>0.50</b> | 0.02        | 0.00        |
| B4                                          | -0.05       | 0.00        | 0.04        | -0.03       | 0.27        | <b>0.47</b> | 0.07        | 0.07        |
| B5                                          | 0.00        | -0.01       | 0.19        | 0.10        | 0.10        | <b>0.45</b> | 0.07        | 0.08        |
| <u>Organisation</u>                         |             |             |             |             |             |             |             |             |
| E3*                                         | -0.03       | 0.46        | 0.03        | 0.00        | 0.04        | 0.09        | <b>0.31</b> | 0.01        |
| E4                                          | 0.01        | 0.24        | -0.01       | 0.00        | 0.11        | -0.05       | <b>0.58</b> | -0.15       |
| E6                                          | 0.05        | -0.01       | 0.06        | -0.04       | 0.08        | 0.05        | <b>0.44</b> | 0.11        |
| B7                                          | -0.04       | 0.27        | 0.00        | 0.00        | 0.11        | -0.05       | <b>0.58</b> | -0.15       |
| E7                                          | n/a         | n/a         | n/a         | n/a         | n/a         | n/a         | <b>n/a</b>  | n/a         |
| <u>Involvement of relatives</u>             |             |             |             |             |             |             |             |             |
| G1                                          | 0.00        | 0.03        | 0.02        | 0.05        | 0.00        | 0.00        | -0.04       | <b>0.84</b> |

|                                                                                       |       |      |      |      |      |      |       |             |
|---------------------------------------------------------------------------------------|-------|------|------|------|------|------|-------|-------------|
| G2                                                                                    | -0.05 | 0.14 | 0.07 | 0.04 | 0.09 | 0.03 | -0.03 | <b>0.63</b> |
| <u>Consideration of comorbidity**</u>                                                 |       |      |      |      |      |      |       |             |
| E10                                                                                   | n/a   | n/a  | n/a  | n/a  | n/a  | n/a  | n/a   | n/a         |
| E11                                                                                   | n/a   | n/a  | n/a  | n/a  | n/a  | n/a  | n/a   | n/a         |
| Eigenvalue                                                                            | 11.15 | 4.48 | 2.67 | 1.76 | 1.34 | 1.15 | 1.04  | 1.00        |
| Variance explained by each factor eliminating other factors                           | 3.23  | 2.38 | 1.79 | 1.16 | 0.91 | 0.89 | 0.77  | 0.77        |
| Variance explained by each factor ignoring other factors                              | 5.64  | 6.80 | 6.96 | 5.11 | 5.36 | 6.75 | 4.00  | 5.08        |
| Final Communality Estimates: Total = 21.443173 (without consideration to comorbidity) |       |      |      |      |      |      |       |             |
| Overall KMO: 0.93                                                                     |       |      |      |      |      |      |       |             |
| Factor corelations                                                                    |       |      |      |      |      |      |       |             |
| Factor 1                                                                              | -     |      |      |      |      |      |       |             |
| Factor 2                                                                              | 0.38  | -    |      |      |      |      |       |             |
| Factor 3                                                                              | 0.18  | 0.32 | -    |      |      |      |       |             |
| Factor 4                                                                              | 0.02  | 0.20 | 0.50 | -    |      |      |       |             |
| Factor 5                                                                              | 0.37  | 0.41 | 0.43 | 0.18 | -    |      |       |             |
| factor 6                                                                              | 0.27  | 0.41 | 0.53 | 0.42 | 0.52 | -    |       |             |
| Factor 7                                                                              | 0.22  | 0.46 | 0.26 | 0.24 | 0.32 | 0.40 | -     |             |
| Factor 8                                                                              | 0.16  | 0.36 | 0.48 | 0.45 | 0.37 | 0.52 | 0.34  | -           |

n/a: Results not available because the items (C1, E7, F5, E10, E11) had been excluded from the analysis, since they were irrelevant for a large proportion of respondents, reducing the data substantial.

\*The item loaded on two factors. The final placement of the item in the factor 'organisation' was primarily based on theoretical considerations and an overall picture including separate analysis of the dimensions.

\*\*When included in the analysis, consideration of comorbidity was clearly an independent factor.

Item A1, B6, D6, E1, E8, E9 and F1 were excluded from the analysis, because they did not load substantially on any factors.
