# Supplementary material
Source: HighWire-hosted journal article supplement (https://bmjopen.bmj.com/content/7/10/e016234)
Supplement: inline-supplementary-material-7 [file inline-supplementary-material-7.pdf]

Supplemental.

Table 6: The final 41 PREM items constituting the patient-reported instrument that measures heart patients' experiences of health care quality in Denmark

| <b>Dimensions and their items</b>                  |                                                                                                                                                            |
|----------------------------------------------------|------------------------------------------------------------------------------------------------------------------------------------------------------------|
| <b>Communication at the hospital</b>               |                                                                                                                                                            |
| 1                                                  | Do you think that the hospital staff involved you in decisions regarding your treatment? (A2)                                                              |
| 2                                                  | Do you think that the hospital staff took you seriously? (A3)                                                                                              |
| 3                                                  | Do you think that the hospital staff did what they could to answer your questions? (A4)                                                                    |
| 4                                                  | Do you think that the hospital staff treated you as a human being and was not only interested in your illness and medication? (A5)                         |
| 5                                                  | Do you think that the hospital staff listened to you? (A6)                                                                                                 |
| 6                                                  | Did you experience that the hospital staff was informed about the treatment of your disease? (E2)                                                          |
| <b>Communication with the general practitioner</b> |                                                                                                                                                            |
| 7                                                  | Do you think that your GP involved you in decisions regarding your treatment? (A7)                                                                         |
| 8                                                  | Do you think that your GP took you seriously? (A8)                                                                                                         |
| 9                                                  | Do you think that your GP did what he/she could to answer your questions? (A9)                                                                             |
| 10                                                 | Do you think that your GP treated you as a human being and was not only interested in your illness and medication? (A10)                                   |
| 11                                                 | Do you think that your GP listened to you? (A11)                                                                                                           |
| 12                                                 | Did you experience that your GP was informed about the course of treatment of your disease? (E5)                                                           |
| <b>Information on disease and treatment</b>        |                                                                                                                                                            |
| 13                                                 | Do you feel informed about which test/examinations you had to undergo and about the course of treatment? (B1)                                              |
| 14                                                 | Do you feel informed about how the disease may affect your future? (B2)                                                                                    |
| 15                                                 | Do you feel informed about what you can do to get better for instance with physical activity or diet? (B3)                                                 |
| 16                                                 | Do you feel informed about who to contact in case your disease is worsening? (B4)                                                                          |
| 17                                                 | Do you feel informed about what your body can physically endure? (B5)                                                                                      |
| <b>Rehabilitation/support</b>                      |                                                                                                                                                            |
| 18 <sup>a</sup>                                    | Have you been offered smoking cessation guidance in connection with your disease? (C1)                                                                     |
| 19 <sup>a</sup>                                    | Have you been offered physical training in connection with your disease? (C2)                                                                              |
| 20 <sup>a</sup>                                    | Have you been offered dietary guidance in connection with your disease? (C3)                                                                               |
| 21 <sup>a</sup>                                    | Have you been offered education about your illness and its treatment in connection with your disease? (C4)                                                 |
| 22 <sup>a</sup>                                    | Have you been offered guidance on sex life and relationships in connection with your disease? (C5)                                                         |
| 23 <sup>a</sup>                                    | Have you been offered psychological/emotional support in connection with your disease? (C6)                                                                |
| 24 <sup>b</sup>                                    | Did healthcare staff at any time ask if you have experienced emotional problems in connection with your disease? (D5)                                      |
| <b>Information on psychosocial aspects</b>         |                                                                                                                                                            |
| 25                                                 | Do you feel informed about the emotional reactions you may experience as a result of your disease? (D1)                                                    |
| 26                                                 | Do you feel informed about the emotional reactions your relatives may experience as a result of your disease? (D2)                                         |
| 27                                                 | Do you feel informed about how the disease may affect your relationship with family, friends and others? (D3)                                              |
| 28                                                 | Do you feel informed about what the disease can mean for your sex life and relationships? (D4)                                                             |
| <b>Organisation</b>                                |                                                                                                                                                            |
| 29                                                 | Do you believe that a doctor or a nurse at the hospital have had an overall view of the course of treatment of your disease? (E3)                          |
| 30                                                 | Do you think that you and/or your relatives have been partly responsible for the course of treatment which you believe the hospital should have been? (E4) |
| 31                                                 | Have you had to press for any guidance or support in connection with your disease? (E6)                                                                    |
| 32                                                 | Did you know what was going to happen when you were discharged from the hospital? (E7)                                                                     |
| 33                                                 | Have you received conflicting information from different staff about your disease? (B7)                                                                    |
| <b>Medication</b>                                  |                                                                                                                                                            |
| 34                                                 | Do you feel informed about why you get medication for your disease? (F2)                                                                                   |
| 35                                                 | Do you feel informed about possible side effects of medications for your disease? (F3)                                                                     |
| 36                                                 | Do you feel informed about how long you should take medication for your disease? (F4)                                                                      |
| 37                                                 | Were you taken seriously when you contacted a doctor due to side effects? (F5)                                                                             |
| <b>Involvement of relatives</b>                    |                                                                                                                                                            |
| 38                                                 | Has the staff made you aware of the possibility of having your relative(s) with you to consultations? (G1)                                                 |
| 39                                                 | Has the staff involved your relative(s), the way you would like? (G2)                                                                                      |
| <b>Consideration of comorbidity</b>                |                                                                                                                                                            |
| 40                                                 | Did the hospital staff take your other diseases (comorbidities) into consideration in the course of treatment of your heart disease? (E10)                 |
| 41                                                 | Did your GP take your other diseases (comorbidities) into consideration in the course of treatment of your heart disease? (E11)                            |

**Reply options**

Yes, to a high degree; Yes, to some degree; To a lesser degree; No, not at all; Do not know.

<sup>a</sup>Yes, and I accepted the offer; Yes, but I rejected the offer; No; Do not know. (Yes/No/Do not know).

<sup>b</sup>Yes, at the hospital; Yes, at my general practitioner; Yes, in my municipality. No (no, not at any time). Do not know. (Yes/No/Do not know)

The items not relevant for all respondents were managed by filter questions e.g. "have you been in contact with your GP in connection with your heart disease (Yes/No)", "if you answered 'No', go to question 'X'", or by including a 'not relevant' response option.
